# Supplementary material
Source: PubMed Central journal article supplement (PMC4249373)

## Supplemental Material

### **Novel Insights into the Mechanism of Inhibition of MmpL3, a Target of Multiple Pharmacophores in *Mycobacterium tuberculosis***

Wei Li<sup>1</sup>, Ashutosh Upadhyay<sup>1</sup>, Fabio L. Fontes<sup>1</sup>, E. Jeffrey North<sup>2\*</sup>, Yuehong Wang<sup>3</sup>, Debbie C. Crans<sup>4</sup>,  
Anna E. Grzegorzewicz<sup>1</sup>, Victoria Jones<sup>1</sup>, Scott G. Franzblau<sup>3</sup>, Richard E. Lee<sup>2</sup>,  
Dean C. Crick<sup>1#</sup>, and Mary Jackson<sup>1#</sup>

From the <sup>1</sup>Mycobacteria Research Laboratories, Department of Microbiology, Immunology and Pathology, Colorado State University, Fort Collins, CO 80523, USA; <sup>2</sup>Department of Chemical Biology and Therapeutics, St. Jude Children's Research Hospital, 262 Danny Thomas Place, Mail Stop 1000, Memphis, TN 38105, USA; and <sup>3</sup>the Institute for Tuberculosis Research, College of Pharmacy, University of Illinois at Chicago, Chicago, Illinois 60621, USA; <sup>4</sup>Department of Chemistry, Colorado State University, Fort Collins, CO 80523, USA

**Figure S1: Effects of INH on the biosynthesis of trehalose mono- and di-mycolates, sulfolipids, di- and poly-acyltrehaloses and phthiocerol dimycocerosates in *Mtb*.**

Surface exposed and cell-associated [<sup>14</sup>C]-acetate-labeled and [1-<sup>14</sup>C]propionate-labeled lipids from untreated and INH-treated *Mtb* H37Rv mc<sup>2</sup>6206 cells were analyzed by TLC as described in Fig. 4.

The solvent systems used are: **(A)** [CHCl<sub>3</sub>:CH<sub>3</sub>OH:H<sub>2</sub>O, 20:4:0.5] ([<sup>14</sup>C]-acetate-labeled lipids); **(B)** [CHCl<sub>3</sub>:CH<sub>3</sub>OH:H<sub>2</sub>O, 60:30:6] ([1-<sup>14</sup>C]propionate-labeled lipids); **(C)** [petroleum ether (60/80°C):ethyl acetate, 98:2; three developments] ([1-<sup>14</sup>C]propionate-labeled lipids); **(D)** first dimension: [petroleum ether (60/80°C):acetone, 92:8; three developments]; second dimension: [acetone:toluene, 95:5] ([1-<sup>14</sup>C]propionate-labeled lipids), and revealed by autoradiography. The same volume of samples was loaded per lane. CL, cardiolipin; PE, phosphatidylethanolamine.

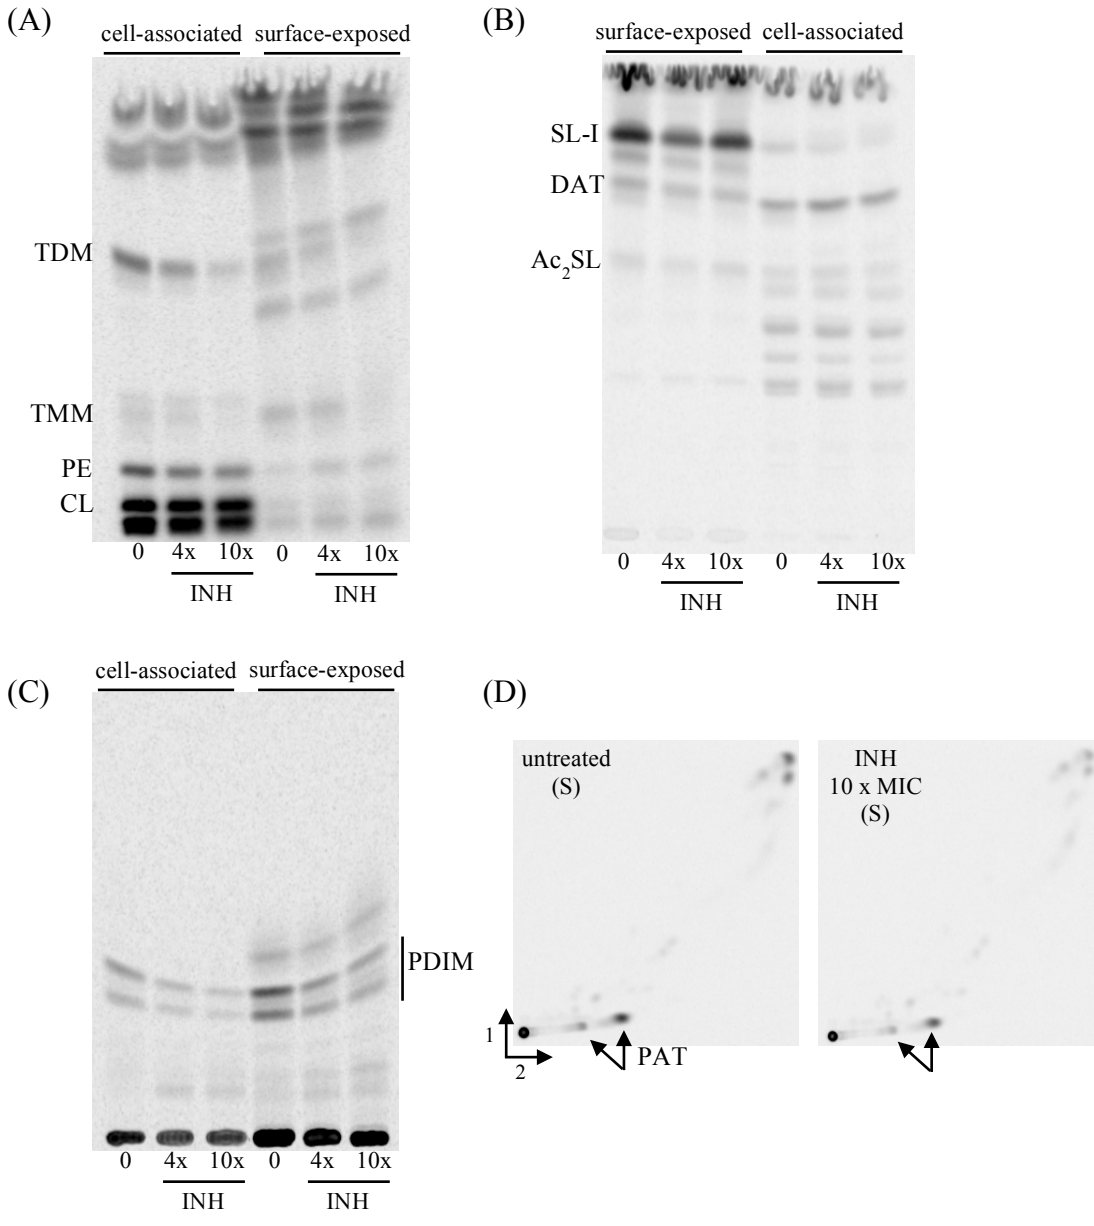

**Figure S2: Effect of THPP-2 and 2418 on the transfer of mycolic acids to their cell envelope acceptors.**

*Mtb* H37Rv mc<sup>2</sup>6206 cultures were either untreated or treated with THPP-2 (1.3 µg/ml [0.5 x MIC] or 5.3 µg/ml [2 x MIC]) or 2418 (1.56 µg/ml [0.5 x MIC] or 6.2 µg/ml [2 x MIC]) and labeled with [<sup>14</sup>C]-acetate as described under Materials and Methods.

Analyses of lipids (A) and cell wall-bound mycolic acid methyl esters (MAMEs) (B) from untreated and treated cells were as described in Fig. 3.

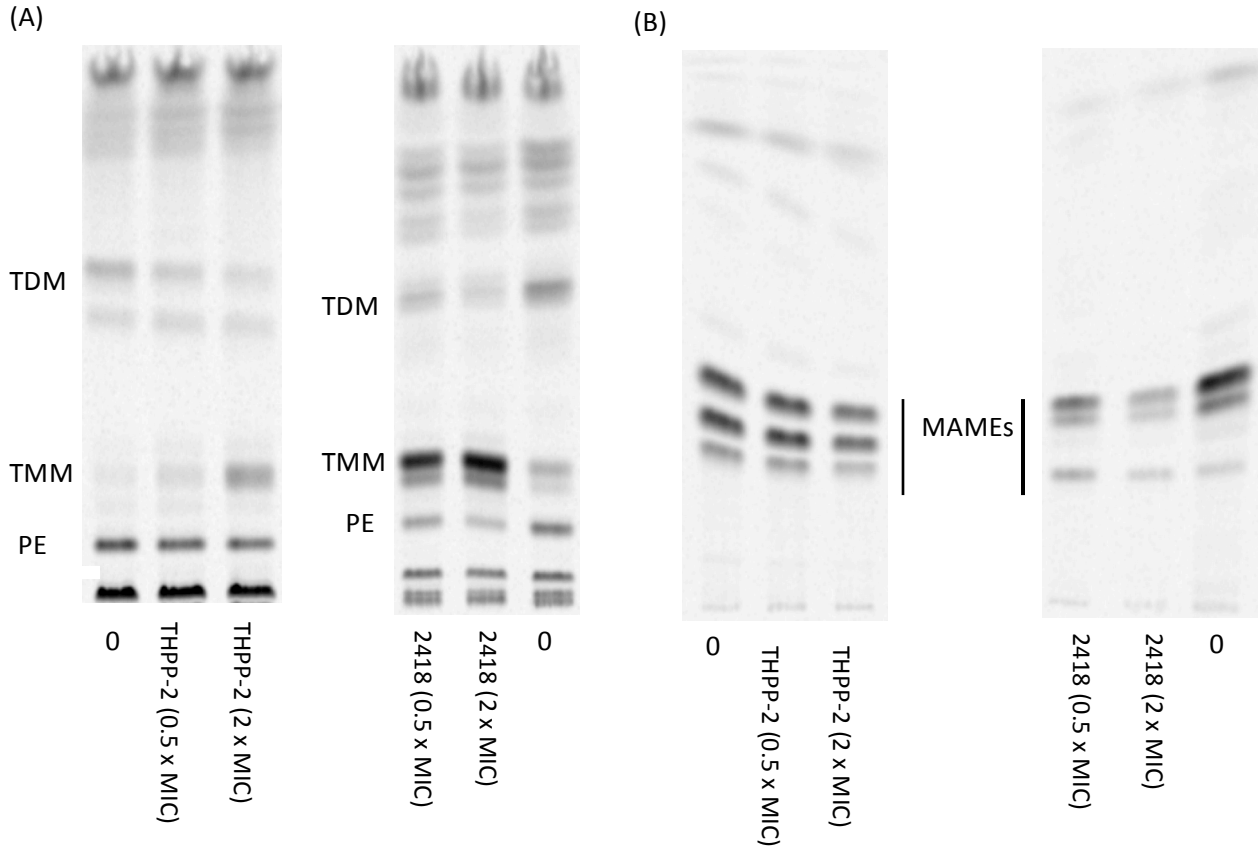

**Figure S3: Predicted topology of MmpL3 and mapping of the mutations reported to confer resistance to SQ109, THPP compounds, adamantyl ureas, BM212 and indolcarboxamides.**

The topology of MmpL3 from *Mtb* was predicted using the TOPPred software (<http://mobyli.pasteur.fr/cgi-bin/portal.py?#forms::toppred>). The amino acids found to be mutated in the various spontaneous resistant mutants are according to references # 9-11, 13-14 and 17-19 and the data presented in Table 4.

Black stars indicate residues thought to participate in the transmembrane electrochemical proton gradient of MmpL3 (D251, R259, D640, Y641, D710; R715). Red hexagons indicate residues mutated in SQ109 (and analogs) resistant mutants; blue hexagons are residues mutated in BM212 (and analogs) resistant mutants of *Mtb* or *M. smegmatis*; brown hexagons are residues mutated in indolcarboxamide resistant mutants; magenta hexagons are residues mutated in THPP resistant mutants; the green residue (G253) is the mutated residue in adamantyl urea as well as some BM212 and indolcarboxamide resistant mutants.

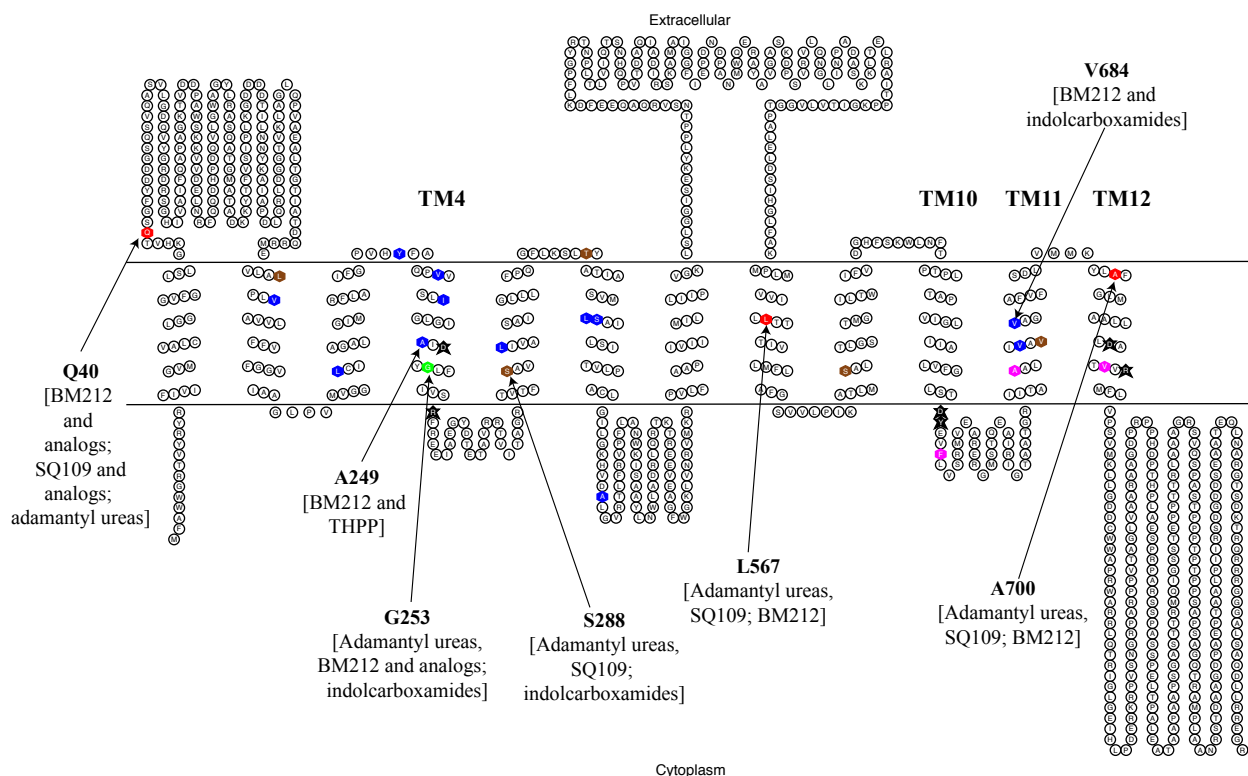

Supplement: AAC.03229-14_zac011143382so1.pdf [file AAC.03229-14_zac011143382so1.pdf]
